# Supplementary material
Source: PubMed Central journal article supplement (PMC6414066)

**Table S1. Bootstrapped Mixed Model Regressions to Age 5 Parenting Behaviors**

|                                      | B           | SE         | 95% CI                 |
|--------------------------------------|-------------|------------|------------------------|
| <b>Model: Maternal Intrusiveness</b> |             |            |                        |
| <b>Depression x NICU Stress</b>      | <b>.05</b>  | <b>.02</b> | <b> [.010, .058]</b>   |
| <b>Depression at Discharge</b>       | <b>.04</b>  | <b>.02</b> | <b> [.016, .083]</b>   |
| NICU Stress at Discharge             | .04         | .15        | [-.271, .305]          |
| <b>Model: Maternal Negativity</b>    |             |            |                        |
| <b>Depression x NICU Stress</b>      | <b>.01</b>  | <b>.00</b> | <b> [.002, .019]</b>   |
| Depression at Discharge              | .01         | .00        | [-.001, .013]          |
| <b>NICU Stress at Discharge</b>      | <b>.07</b>  | <b>.03</b> | <b> [.018, .129]</b>   |
| <b>Model: Maternal Sensitivity</b>   |             |            |                        |
| <b>Depression at Discharge</b>       | <b>-.05</b> | <b>.02</b> | <b> [-.098, -.001]</b> |
| NICU Stress at Discharge             | -.02        | .19        | [-.347, .381]          |
| <b>Model: Maternal Positivity</b>    |             |            |                        |
| Depression at Discharge              | -.00        | .03        | [-.065, .067]          |
| NICU Stress at Discharge             | -.17        | .18        | [-.578, .982]          |

Note: Numbers represent unstandardized regression coefficients with regressions done in linear mixed modeling, using bias-corrected bootstrapping with 1000 samples and 95% CIs. CIs that do not contain 0 are considered significant. All models adjusted for child sex, maternal education, income to needs ratio, child IQ, maternal IQ, and maternal depression at age 5. Only child IQ remained a significant predictor of Intrusiveness at age 5, B(SE)=-.02 (.01), 95%CI [-.047, -.010].

**Figure S1. Subject Recruitment and Attrition**

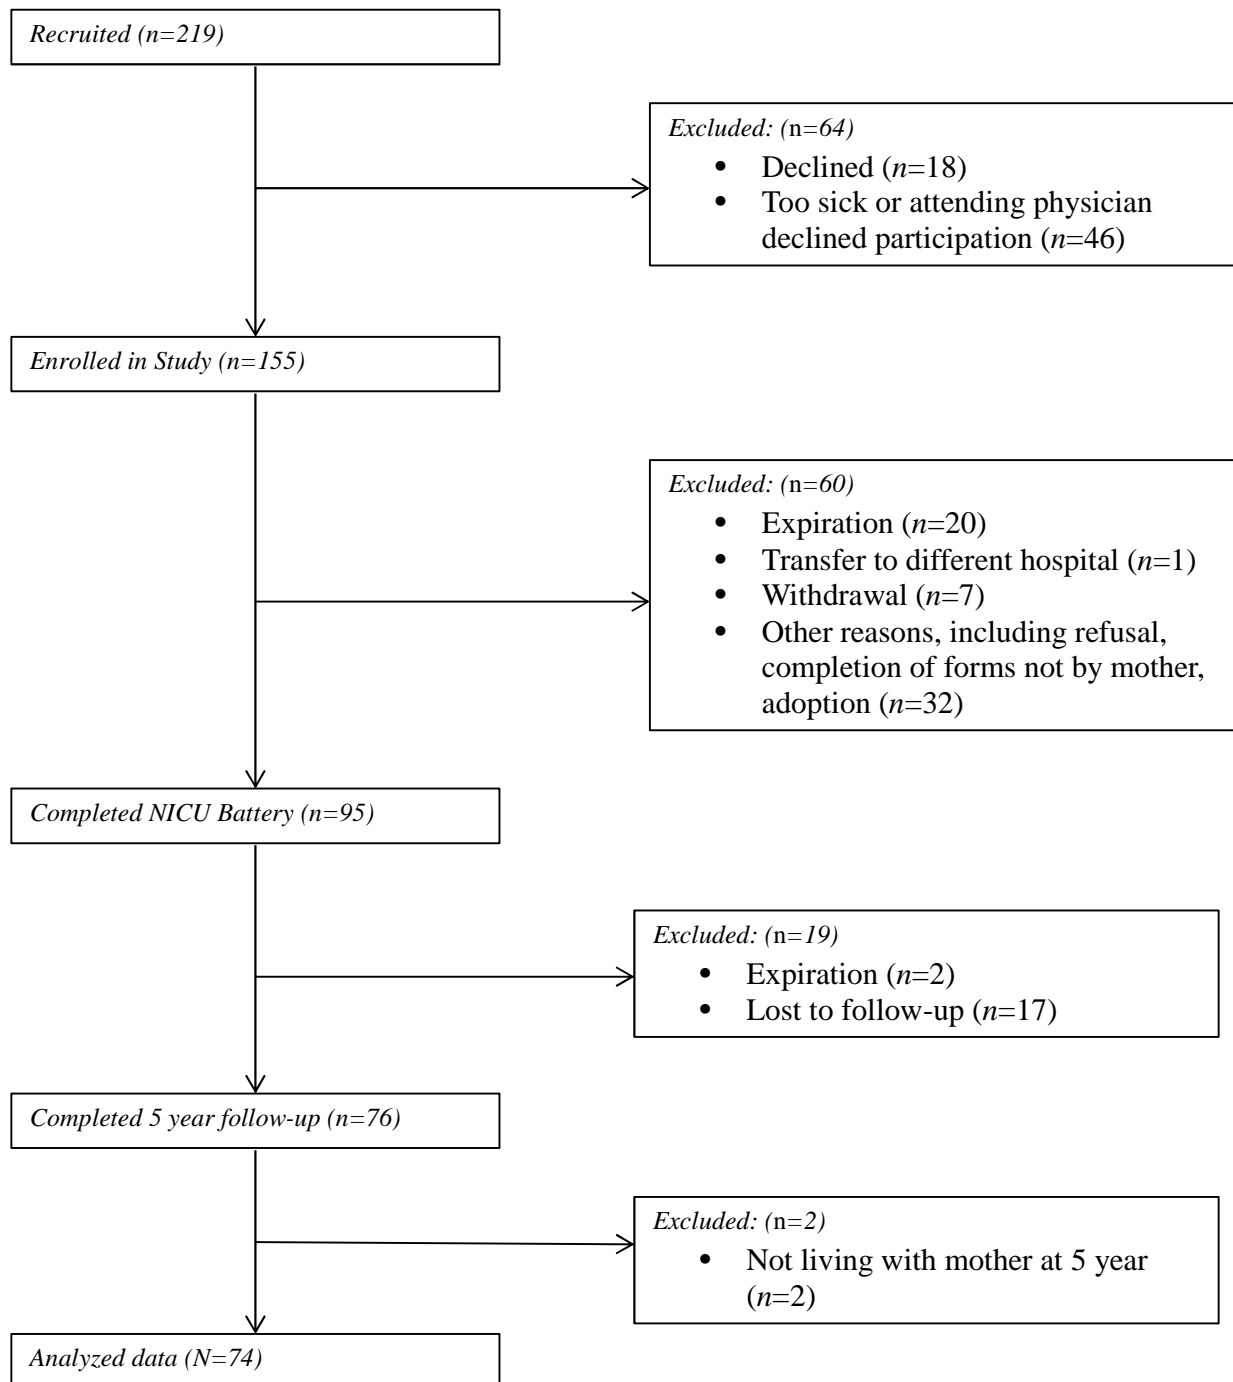

Supplement: NIHMS1517895-supplement-1.pdf [file NIHMS1517895-supplement-1.pdf]
